# Supplementary material for: First‐food systems transformations and the ultra‐processing of infant and young child diets: The determinants, dynamics and consequences of the global rise in commercial milk formula consumption
Source: PubMed Central journal article supplement — Matern Child Nutr. 2020 Nov 3;17(2):e13097. doi: 10.1111/mcn.13097 (PMC7988871; doi:10.1111/mcn.13097), 2020-11-03
Supplement: MCN-17-e13097-s001.pdf [file MCN-17-e13097-s001.pdf]

## Supplementary Appendix

### Breastfeeding, first-food systems transformations and the global boom in commercial milk formula markets: A synthesis of data and literature on its dynamics, commercial determinants and consequences

**Table S1.** Commercial milk formula category definitions\*

| Category            | Description and examples of leading brands                                                                                                                                                                                                                                                                                                                                                                                                                                                                                                                                                                                                                                                                                                                                                                 |
|---------------------|------------------------------------------------------------------------------------------------------------------------------------------------------------------------------------------------------------------------------------------------------------------------------------------------------------------------------------------------------------------------------------------------------------------------------------------------------------------------------------------------------------------------------------------------------------------------------------------------------------------------------------------------------------------------------------------------------------------------------------------------------------------------------------------------------------|
| Total formula       | Aggregate of standard, follow-up, toddler and special categories                                                                                                                                                                                                                                                                                                                                                                                                                                                                                                                                                                                                                                                                                                                                           |
| - Standard formula  | Commercial milk formula products marketed for infants aged 0–6 months, although some for 0–12 months. Major brands include Enfamil (Mead Johnson), Hohoemi (Meiji Dairies), Isomil (Abbott Laboratories), Nan (Nestlé), Similac (Abbott Laboratories), SMA (Pfizer), S-26 (Pfizer)                                                                                                                                                                                                                                                                                                                                                                                                                                                                                                                         |
| - Follow-up formula | Commercial milk formula products marketed for infants aged 6–12 months. Major brands include Beba (Nestlé), Carnation (Nestlé), Enfapro (Mead Johnson), Good Start (Nestlé), Nan (Nestlé), Promil (Pfizer), Step (Meiji Dairies), SMA (Pfizer)                                                                                                                                                                                                                                                                                                                                                                                                                                                                                                                                                             |
| - Toddler formula   | Commercial milk formula products marketed for young children, typically aged 13–36 months (also called ‘growing-up milks’). Major brands include Bear Brand (Nestlé), Enfagrow (Mead Johnson), Lactel (Lactalis), Neslac (Nestlé), Nido (Nestlé), Similac Advance 3 (Abbott)                                                                                                                                                                                                                                                                                                                                                                                                                                                                                                                               |
| - Special formula   | Commercial milk formulas for medical conditions, sold over-the-counter or by prescription. Includes products for: i) allergy treatment (e.g. Bayer Novalac Allergy, Mead Johnson Enfamil Pregestimil); ii) hypoallergenic - partially hydrolyzed to prevent cow's milk allergy (usually labelled 'HA' e.g. Nestle Nan HA1); iii) lactose intolerance - lactose free milks usually soy-based (e.g. Similac Isomil Advance Soy Formula), or processed to eliminate lactose content (e.g. Enfamil LactoFree LIPIL); and iv) others for specific conditions including premature birth (e.g. Enfamil Premature LIPIL), anti-diarrhoea (e.g. Bayer Novalac Diarrhoea), anti-regurgitation (e.g. Aptamil Gold+ AR), poor digestion (e.g. Enfamil Gentlease LIPIL), and reduced iron (e.g. Enfamil LIPIL Low Iron) |

Footnotes: \*These are categories defined by Euromonitor; in reality, a much wider range of age-specific categories exist. For example, RB Mead Johnson’s Enfamil brand includes products for newborns (0-3m), all infants (0-12m) and for a narrower toddler age band (9-18m). Many major brands are present across the standard, follow-up and toddler formula categories, reflecting the cross-promotion marketing strategy used by companies. Milk formula products also exist for children aged from 3-10 years, adolescents, pregnant and lactating mothers, and the elderly. Some products are not technically ‘milk’ formulas, as they contain no actual milk ingredients; for example, those containing non-milk protein sources.

**Table S2.** Included countries by World Bank income level and UNICEF region

| <b>Income level</b>   | <b>GNI per capita<br/>US\$, PPP</b> | <b>Region</b>                   | <b>Country</b>       |
|-----------------------|-------------------------------------|---------------------------------|----------------------|
| High-income<br>(N=37) | >\$12,376                           | East Asia and Pacific           | Australia            |
|                       |                                     | East Asia and Pacific           | Hong Kong (China)    |
|                       |                                     | East Asia and Pacific           | Japan                |
|                       |                                     | East Asia and Pacific           | New Zealand          |
|                       |                                     | East Asia and Pacific           | Singapore            |
|                       |                                     | East Asia and Pacific           | South Korea          |
|                       |                                     | Eastern Europe and Central Asia | Croatia              |
|                       |                                     | Latin America and Caribbean     | Chile                |
|                       |                                     | Latin America and Caribbean     | Uruguay              |
|                       |                                     | Middle East and North Africa    | Israel               |
|                       |                                     | Middle East and North Africa    | Saudi Arabia         |
|                       |                                     | Middle East and North Africa    | United Arab Emirates |
|                       |                                     | North America                   | Canada               |
|                       |                                     | North America                   | USA                  |
|                       |                                     | Western Europe                  | Austria              |
|                       |                                     | Western Europe                  | Belgium              |
|                       |                                     | Western Europe                  | Czech Republic       |
|                       |                                     | Western Europe                  | Denmark              |
|                       |                                     | Western Europe                  | Estonia              |
|                       |                                     | Western Europe                  | Finland              |
|                       |                                     | Western Europe                  | France               |
|                       |                                     | Western Europe                  | Germany              |
|                       |                                     | Western Europe                  | Greece               |
|                       |                                     | Western Europe                  | Ireland              |
|                       |                                     | Western Europe                  | Italy                |
|                       |                                     | Western Europe                  | Latvia               |
|                       |                                     | Western Europe                  | Lithuania            |
|                       |                                     | Western Europe                  | Netherlands          |
|                       |                                     | Western Europe                  | Norway               |
|                       |                                     | Western Europe                  | Poland               |
|                       |                                     | Western Europe                  | Portugal             |
|                       |                                     | Western Europe                  | Slovakia             |
|                       |                                     | Western Europe                  | Slovenia             |
| Western Europe        | Spain                               |                                 |                      |
| Western Europe        | Sweden                              |                                 |                      |
| Western Europe        | Switzerland                         |                                 |                      |
| Western Europe        | United Kingdom                      |                                 |                      |
|                       | \$3,996 – 12,375                    | East Asia and Pacific           | China                |

| <b>Income level</b>              | <b>GNI per capita<br/>US\$, PPP</b> | <b>Region</b>                   | <b>Country</b>         |
|----------------------------------|-------------------------------------|---------------------------------|------------------------|
| Upper-middle<br>income<br>(N=25) |                                     | East Asia and Pacific           | Malaysia               |
|                                  |                                     | East Asia and Pacific           | Thailand               |
|                                  |                                     | Eastern and Southern Africa     | South Africa           |
|                                  |                                     | Eastern Europe and Central Asia | Azerbaijan             |
|                                  |                                     | Eastern Europe and Central Asia | Belarus                |
|                                  |                                     | Eastern Europe and Central Asia | Bosnia and Herzegovina |
|                                  |                                     | Eastern Europe and Central Asia | Bulgaria               |
|                                  |                                     | Eastern Europe and Central Asia | Georgia                |
|                                  |                                     | Eastern Europe and Central Asia | Kazakhstan             |
|                                  |                                     | Eastern Europe and Central Asia | North Macedonia        |
|                                  |                                     | Eastern Europe and Central Asia | Romania                |
|                                  |                                     | Eastern Europe and Central Asia | Russia                 |
|                                  |                                     | Eastern Europe and Central Asia | Serbia                 |
|                                  |                                     | Eastern Europe and Central Asia | Turkey                 |
|                                  |                                     | Latin America and Caribbean     | Argentina              |
|                                  |                                     | Latin America and Caribbean     | Brazil                 |
|                                  |                                     | Latin America and Caribbean     | Colombia               |
|                                  |                                     | Latin America and Caribbean     | Costa Rica             |
|                                  |                                     | Latin America and Caribbean     | Dominican Republic     |
|                                  |                                     | Latin America and Caribbean     | Ecuador                |
|                                  |                                     | Latin America and Caribbean     | Mexico                 |
|                                  |                                     | Latin America and Caribbean     | Peru                   |
| Middle East and North Africa     | Algeria                             |                                 |                        |
| Western Europe                   | Hungary                             |                                 |                        |
| Lower-middle<br>income<br>(N=15) | \$1,026 – 3,995                     | East Asia and Pacific           | Indonesia              |
|                                  |                                     | East Asia and Pacific           | Philippines            |
|                                  |                                     | East Asia and Pacific           | Vietnam                |
|                                  |                                     | Eastern and Southern Africa     | Kenya                  |
|                                  |                                     | Eastern Europe and Central Asia | Ukraine                |
|                                  |                                     | Eastern Europe and Central Asia | Uzbekistan             |
|                                  |                                     | Latin America and Caribbean     | Bolivia                |
|                                  |                                     | Latin America and Caribbean     | Guatemala              |
|                                  |                                     | Middle East and North Africa    | Egypt                  |
|                                  |                                     | Middle East and North Africa    | Morocco                |
|                                  |                                     | Middle East and North Africa    | Tunisia                |
|                                  |                                     | South Asia                      | India                  |
|                                  |                                     | South Asia                      | Pakistan               |
|                                  |                                     | West and Central Africa         | Cameroon               |
| West and Central Africa          | Nigeria                             |                                 |                        |

**Figure S1.** Total commercial BMS sales volumes for all countries combined, 2005-19 with projections to 2024

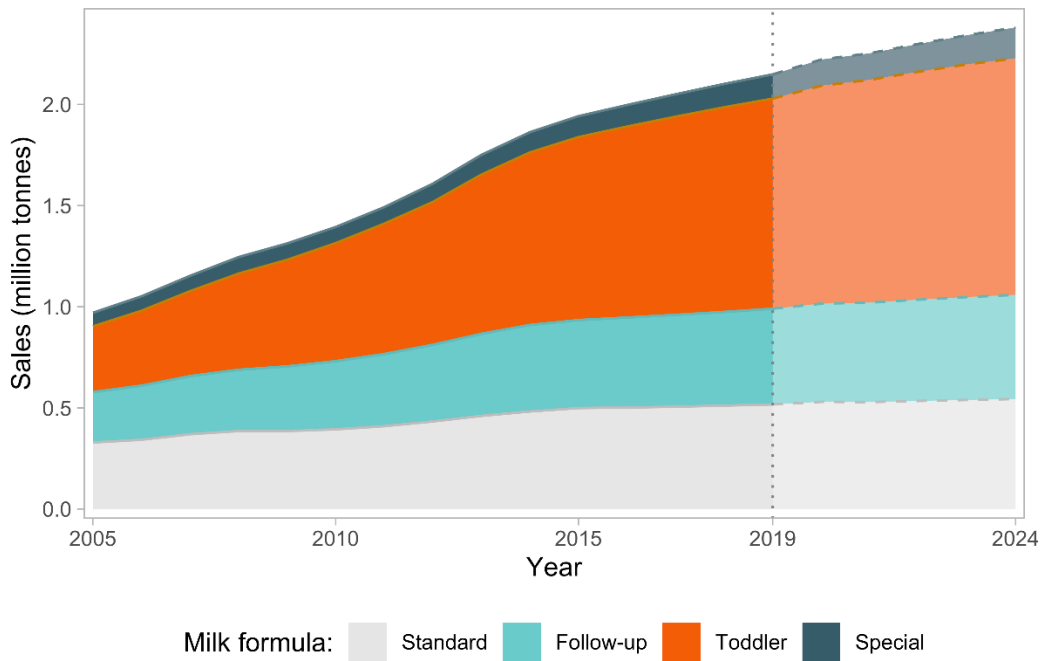

Footnote: Data sourced from Euromonitor Passport

**Figure S2.** World dry milk production by region, 1961-2014

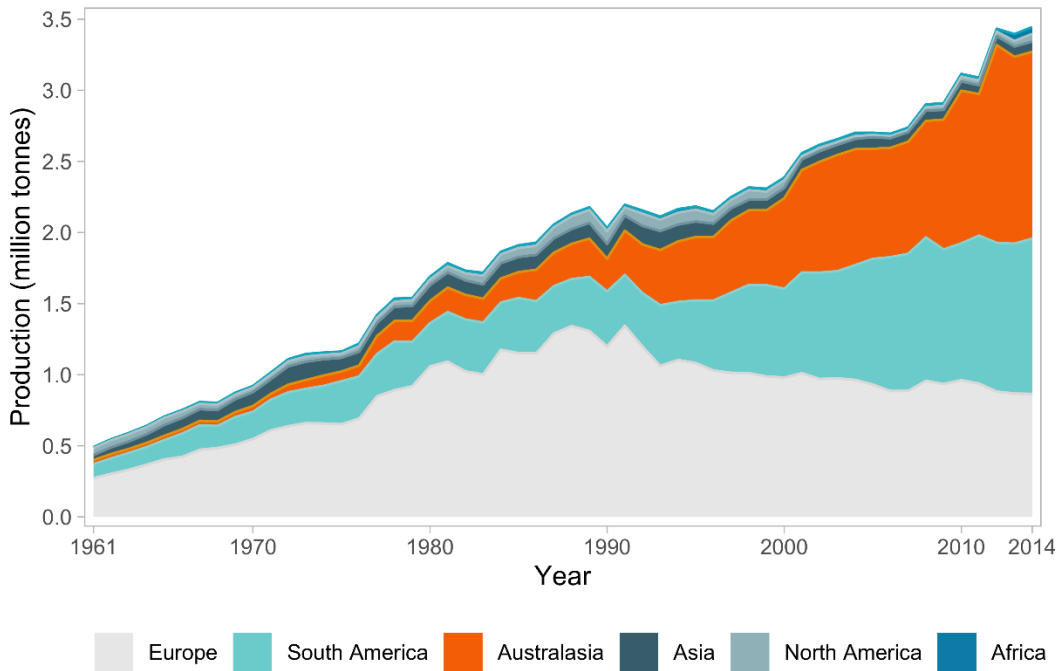

Footnote: Data sourced from the Food and Agricultural Organization (<http://www.fao.org/faostat>)
